# Supplementary material for: Deletion of ribosomal protein genes is a common vulnerability in human cancer, especially in concert with TP53 mutations
Source: PubMed Central journal article supplement (PMC5376749; doi:10.15252/emmm.201606660), 2017-03-06
Supplement: EMMM-9-498-s001.pdf [file EMMM-9-498-s001.pdf]

## Expanded View Figures

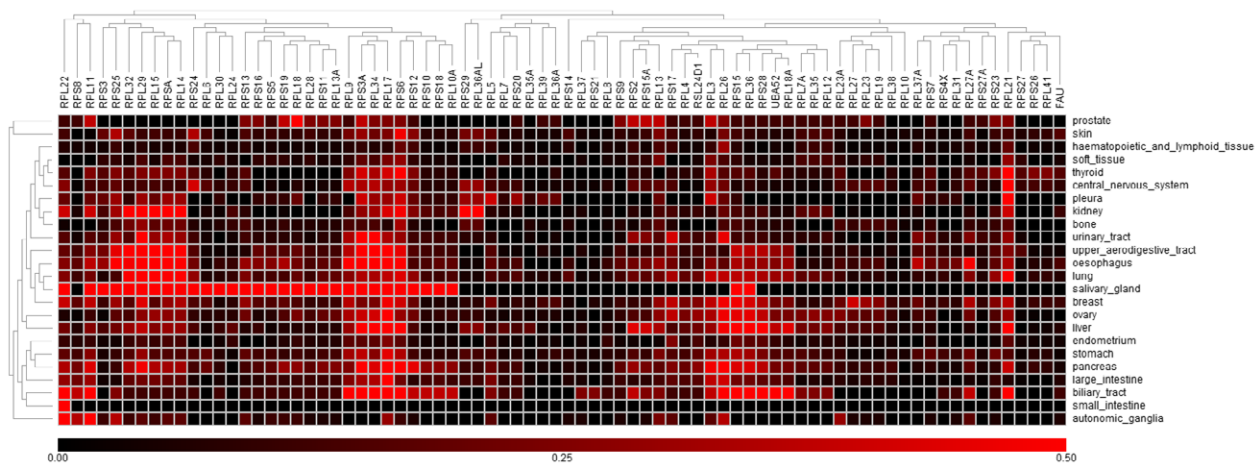

Figure EV1. RPG deletion frequencies in the CCLE data.

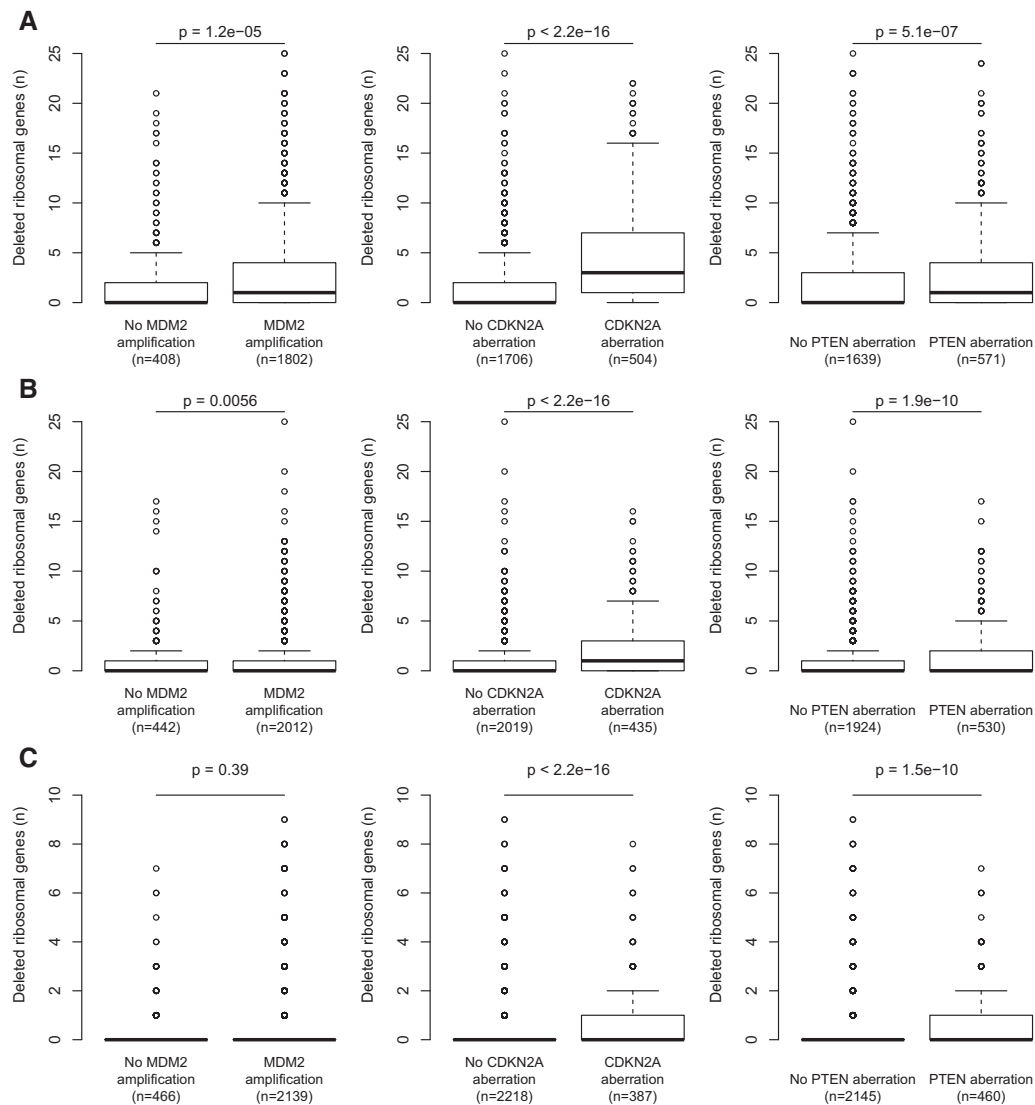

**Figure EV2. Deletions of key genes of the p53 pathway in *TP53*-wild-type cases.**

A–C Among tumors without detectable *TP53* deletion/mutation, the RPG deletions that could be detected were enriched in tumors harboring alternative p53-inactivating lesions, including *MDM2* amplifications, *CDKN2A* deletions, and *PTEN* deletions. Results obtained using  $\log_2$  ratio thresholds (A)  $-0.3$ ; (B)  $-0.5$ ; (C)  $-0.7$ . To avoid biases introduced by co-deletion, RPGs on chromosome 12, 9, or 10 were excluded from the *MDM2*, *CDKN2A*, and *PTEN* analyses, respectively. Boxes indicate medians and the first and third quartiles. Whiskers indicate first and third quartiles  $\pm 1.5$  times the interquartile range. Notches indicate confidence intervals around the median. *P*-values indicate significance by Wilcoxon rank-sum test.

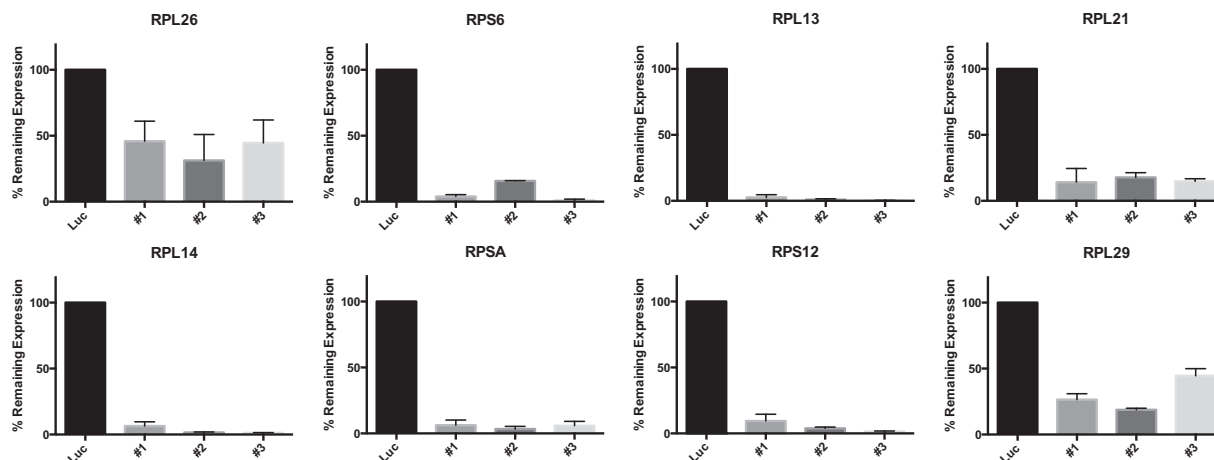

**Figure EV3. Validation of shRNAs targeting frequently deleted RPGs.**

mRNA expression levels of the indicated ribosomal protein gene were measured by quantitative real-time PCR. Ribosomal protein gene knockdown is shown as percentage of the gene expression in cells with control (luciferase) knockdown. Error bars are min-max of duplicates.

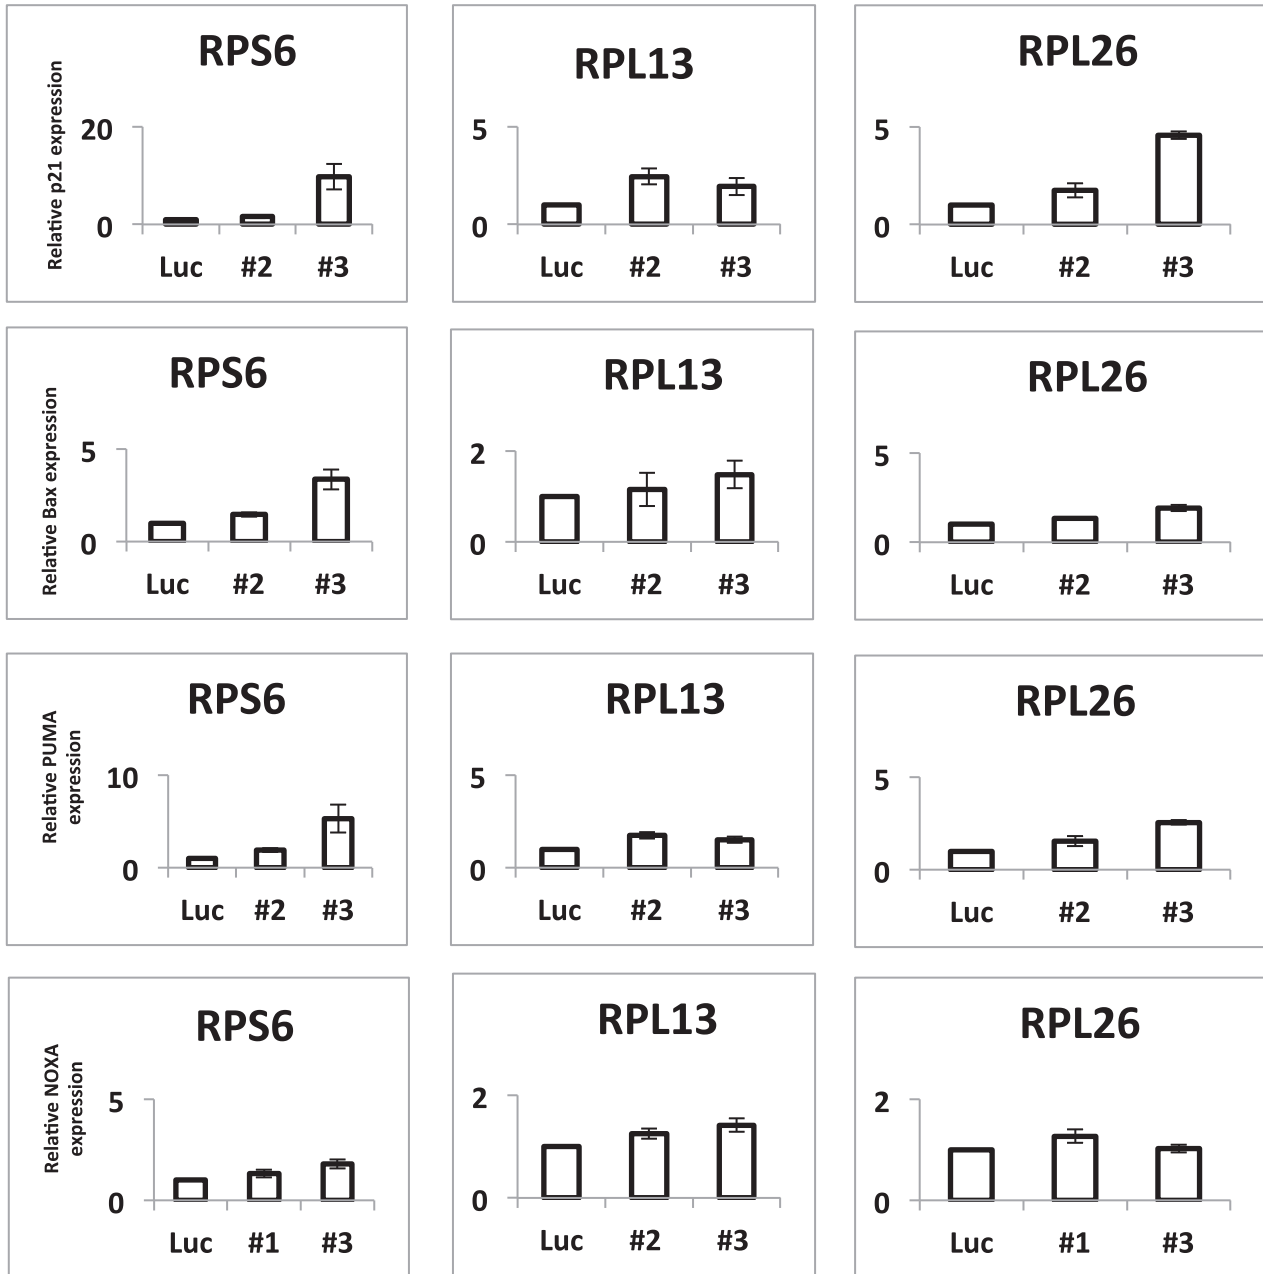

**Figure EV4. Knockdown of identified RPGs induces p53 target genes.**

Expression of the p53 target genes *P21*, *BAX*, *PUMA*, and *NOXA* in MOLM13 cells, as measured by qPCR after knockdown with shRNAs toward *RPS6*, *RPL13*, *RPL26* (two per gene; as in Fig 2), or luciferase (control). As shown, knockdown of these three RPGs induces the p53 target genes. Error bars are min-max. Duplicates.

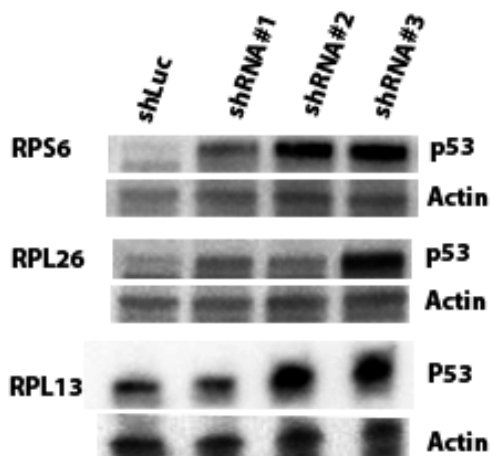

**Figure EV5. Knockdown of identified RPGs induces p53.**

Western blots showing p53 protein levels in MOLM13 leukemia cells after knockdown with shRNAs toward *RPS6*, *RPL26*, *RPL13* (three per gene), or luciferase (control).

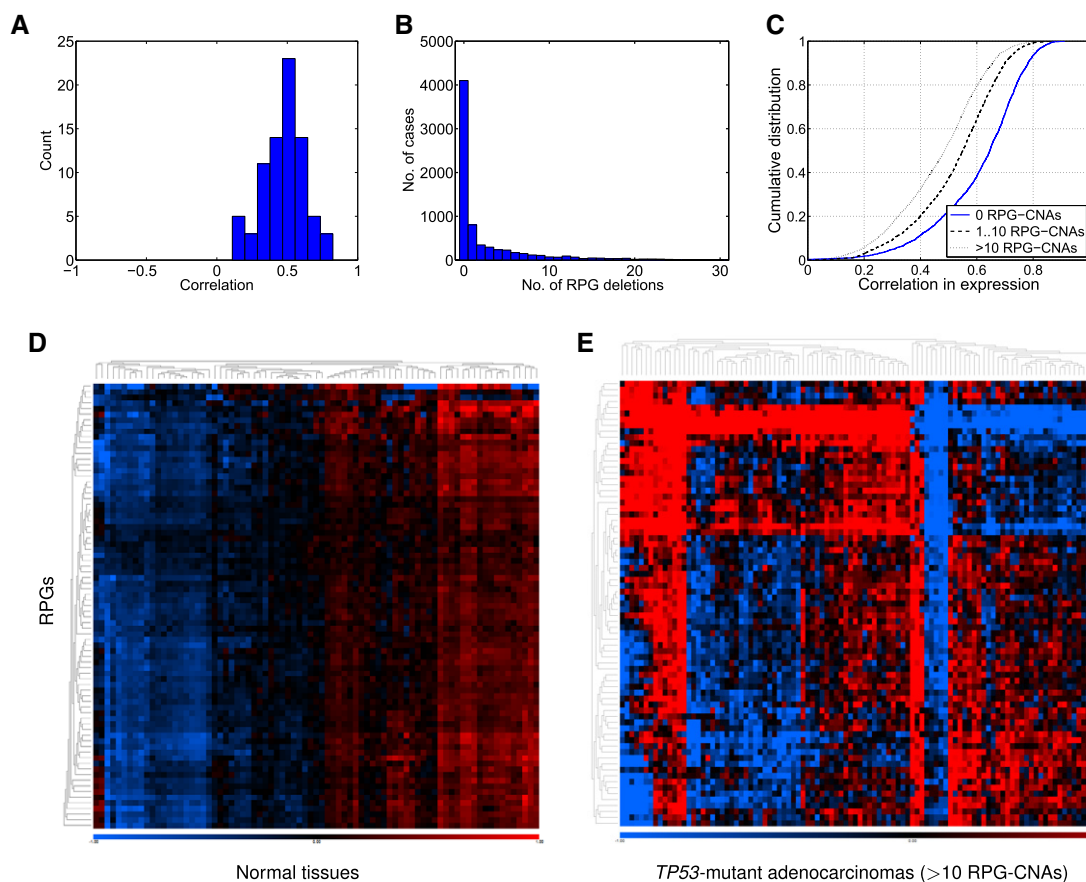

**Figure EV6. While RPG are tightly co-expressed in normal tissues, copy number aberrations affecting RPGs lead to uncoordinated expression.**

- A Correlations between RPG copy number and expression across 4,919 TCGA samples.
- B Numbers of RPG deletions per sample. Multiple RPG deletions are common.
- C Cumulative distributions of Pearson correlation coefficient for all pairs of RPGs across the TCGA RNA-sequencing data. Tumors with more RPG copy number aberrations show less coordinated RPG expression.
- D Expression of RPGs in normal tissues (SymAtlas; NCBI Gene Expression Omnibus GSE96).
- E Expression of RPG in colorectal adenocarcinomas harboring 10 or more RPG copy number aberrations (TCGA samples).

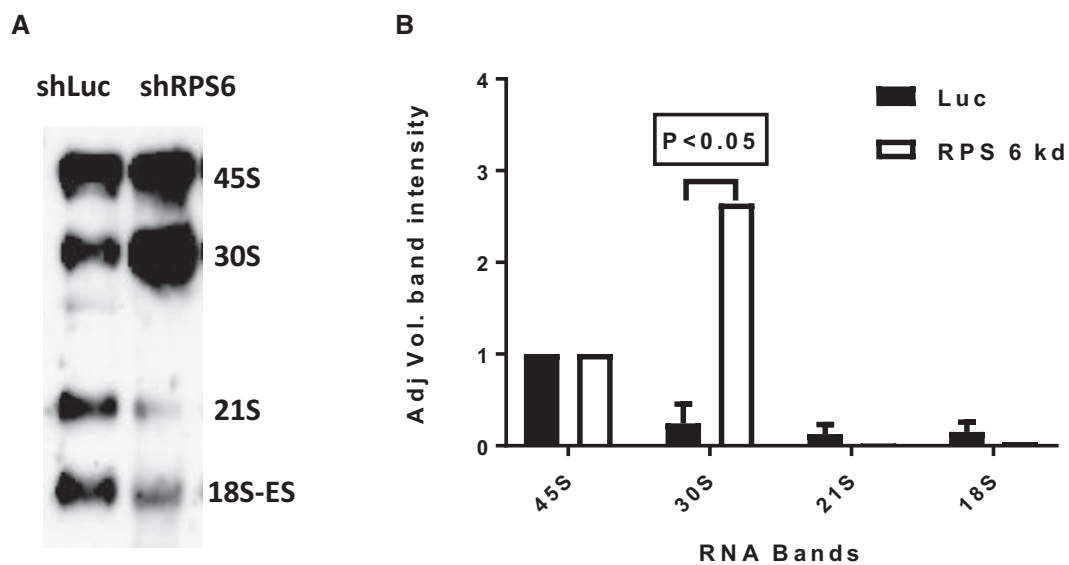

**Figure EV7. Effects of RPS6 knockdown on rRNA pattern.**

A Representative Northern blot showing rRNA patterns in MOLM13 leukemia cells after knockdown with shRNA against RPS6 (shRPS6) or luciferase control (shLuc).

B Quantification of rRNA species from three Northern blot gels (error bars show standard deviation; Student's t-test *P*-value). As shown, knockdown of RPS6 yielded increased 30S rRNA levels and decreased 21S and 18S rRNA levels, which is congruent with the results obtained for primary ALL cells shown in Fig 3.
